# Supplementary material for: The Use of Demographics and Psychographics to Study Product Effects with Nutrient Supplements: Exploratory Multi-Country Data
Source: MDPI journal article supplement (doi:10.3390/foods10081918), 2021-08-18
Supplement: s1 [file s1]

SUPPLEMENT TABLES

**Table S1A.** Studies 1-6: Overall Liking mean ratings - demographic effects of gender by study.

| Study              | Gender | Supplement              |              |              |              |
|--------------------|--------|-------------------------|--------------|--------------|--------------|
|                    |        | Overall all supplements | A            | B            |              |
| 1. Japan (2014)    |        |                         |              |              |              |
|                    | M      | n=105, 6.01a            | n=105, 6.00a | n=105, 6.01a |              |
|                    | F      | n=101, 5.62b            | n=101, 5.50b | n=101, 5.73a |              |
| 2. US (2015)       |        | Overall all supplements | C            | D            | E            |
|                    | M      | n=238, 6.50a            | n=93, 6.25a  | n=75, 6.74a  | n=70, 6.56a  |
|                    | F      | n=319, 6.26a            | n=111, 6.08a | n=104, 6.45a | n=104, 6.25a |
| 3. Germany (2017)  |        | Overall all supplements | F            | G            |              |
|                    | M      | n=77, 6.68a             | n=77, 6.89a  | n=77, 6.46a  |              |
|                    | F      | n=105, 6.62a            | n=105, 6.89a | n=105, 6.35a |              |
| 4. Japan (2019)    |        | Overall all supplements | H            | I            |              |
|                    | M      | n=98, 6.03a             | n=98, 5.97a  | n=98, 6.09a  |              |
|                    | F      | n=108, 5.85a            | n=108, 5.87a | n=108, 5.82a |              |
| 5. US (2019)       |        | Overall all supplements | J            | K            |              |
|                    | M      | n=113, 6.70b            | n=113, 6.71b | n=113, 6.69a |              |
|                    | F      | n=104, 7.11a            | n=104, 7.14a | n=104, 7.09a |              |
| 6. Thailand (2019) |        | Overall all supplements | L            | M            | N            |
|                    | M      | n=313, 7.23a            | n=101, 6.98a | n=109, 7.36a | n=103, 7.35a |
|                    | F      | n=360, 7.11a            | n=116, 6.90a | n=125, 7.20a | n=119, 7.24a |

Note: Upper-case letters refer to test supplements. Different lower-case letters beside each mean across rows within each study and demographic represents a significant difference at  $\alpha=0.05$ .

**Table S1B.** Studies 1-6: Overall Liking mean ratings - demographic effects of age group by study.

| Study              | Age   | Supplement           |              |              |              |
|--------------------|-------|----------------------|--------------|--------------|--------------|
|                    |       | Over all supplements | A            | B            |              |
| 1. Japan (2014)    | 25-34 | n=54, 5.61a          | n=54, 5.62a  | n=54, 5.60a  |              |
|                    | 35-44 | n=86, 5.85a          | n=86, 5.82a  | n=86, 5.87a  |              |
|                    | 45-54 | n=66, 5.95a          | n=66, 5.80a  | n=66, 6.10a  |              |
| 2. US (2015)       |       | Over all supplements | C            | D            | E            |
|                    | 25-34 | n=170, 6.39a         | n=62, 6.30a  | n=55, 6.40a  | n=53, 6.48a  |
|                    | 35-44 | n=155, 6.48a         | n=59, 6.15a  | n=49, 6.94a  | n=47, 6.41a  |
|                    | 45-54 | n=232, 6.26a         | n=83, 6.06a  | n=75, 6.46a  | n=74, 6.28a  |
| 3. Germany (2017)  |       | Over all supplements | F            | G            |              |
|                    | 25-34 | n=48, 6.40b          | n=48, 6.75b  | n=48, 6.05b  |              |
|                    | 35-44 | n=49, 6.57b          | n=49, 6.69b  | n=49, 6.45b  |              |
|                    | 45-54 | n=64, 6.61b          | n=64, 6.95b  | n=64, 6.27b  |              |
|                    | 55+   | n=21, 7.49a          | n=21, 7.50a  | n=21, 7.48a  |              |
| 4. Japan (2019)    |       | Over all supplements | H            | I            |              |
|                    | 25-34 | n=56, 5.68b          | n=56, 5.69a  | n=56, 5.68b  |              |
|                    | 35-44 | n=87, 6.06a          | n=87, 5.95a  | n=87, 6.16a  |              |
|                    | 45-54 | n=63, 5.98ab         | n=63, 6.07a  | n=63, 5.90ab |              |
| 5. US (2019)       |       | Over all supplements | J            | K            |              |
|                    | 25-34 | n=77, 6.66b          | n=77, 6.55b  | n=77, 6.78a  |              |
|                    | 35-44 | n=70, 6.89ab         | n=70, 6.94ab | n=70, 6.83a  |              |
|                    | 45-54 | n=70, 7.14a          | n=70, 7.25a  | n=70, 7.04a  |              |
| 6. Thailand (2019) |       | Over all supplements | L            | M            | N            |
|                    | 25-34 | n=306, 7.24a         | n=102, 6.98a | n=103, 7.26a | n=101, 7.49a |
|                    | 35-44 | n=223, 7.16a         | n=73, 6.95a  | n=76, 7.30a  | n=74, 7.23a  |
|                    | 45-54 | n=144, 7.03a         | n=42, 6.81a  | n=55, 7.26a  | n=47, 6.96a  |

Note: Upper-case letters refer to test supplements. Different lower-case letters beside each mean across rows within each study and demographic represents a significant difference at  $\alpha=0.05$ .

**Table S1C.** Studies 1-6: Overall Liking mean ratings - demographic effects of user type by study.

| Study              | User                 | Supplement           |              |              |              |
|--------------------|----------------------|----------------------|--------------|--------------|--------------|
|                    |                      | Over all supplements | A            | B            |              |
| 1. Japan (2014)    | Test supplement      | n=206, 5.82          | n=206, 5.76  | n=206, 5.87  |              |
|                    | Lapsed               |                      |              |              |              |
|                    | Non-User             |                      |              |              |              |
| 2. US (2015)       | Over all supplements |                      | C            | D            | E            |
|                    | Test supplement      | n=112, 7.23a         | n=49, 6.99a  | n=35, 7.40a  | n=28, 7.45a  |
|                    | Lapsed               | n=30, 6.72a          | n=15, 6.33ab | n=7, 6.86ab  | n=8, 7.31a   |
|                    | Non-User             | n=415, 6.10b         | n=140, 5.85b | n=137, 6.35b | n=138, 6.11b |
| 3. Germany (2017)  | Over all supplements |                      | F            | G            |              |
|                    | Test supplement      | n=44, 7.40a          | n=44, 7.53a  | n=44, 7.27a  |              |
|                    | Lapsed               | n=9, 7.31a           | n=9, 7.56a   | n=9, 7.06ab  |              |
|                    | Non-User             | n=129, 6.34b         | n=129, 6.62b | n=129, 6.05b |              |
| 4. Japan (2019)    | Over all supplements |                      | H            | I            |              |
|                    | Test supplement      | n=206, 5.93          | n=206, 5.92  | n=206, 5.95  |              |
|                    | Lapsed               |                      |              |              |              |
|                    | Non-User             |                      |              |              |              |
| 5. US (2019)       | Over all supplements |                      | J            | K            |              |
|                    | Test supplement      | n=67, 7.36a          | n=67, 7.34a  | n=67, 7.38a  |              |
|                    | Lapsed               | n=9, 6.86ab          | n=9, 6.94ab  | n=9, 6.78ab  |              |
|                    | Non-User             | n=141, 6.68b         | n=141, 6.71b | n=141, 6.65b |              |
| 6. Thailand (2019) | Over all supplements |                      | L            | M            | N            |
|                    | Test supplement      | n=344, 7.38a         | n=109, 7.12a | n=122, 7.49a | n=113, 7.50a |
|                    | Lapsed               | n=12, 6.75ab         | n=5, 5.50ab  | n=4, 7.50a   | n=3, 7.83ab  |
|                    | Non-User             | n=317, 6.96b         | n=103, 6.80b | n=108, 7.02b | n=106, 7.05b |

Note: Upper-case letters refer to test supplements. Different lower-case letters beside each mean across rows within each study and demographic represents a significant difference at  $\alpha=0.05$ .

**Table S2A.** Study 1: Average Overall Liking (Monday and Friday) by psychographic group (low and high).

| Study<br>Product<br>Scorers | 1. Japan (2014) |       |           |       |
|-----------------------------|-----------------|-------|-----------|-------|
|                             | A (n=206)       |       | B (n=206) |       |
|                             | Low             | High  | Low       | High  |
| AIOS                        | 5.67a           | 5.87a | 5.75a     | 6.03a |
| Seek active                 | 5.63a           | 5.87a | 5.76a     | 5.97a |
| Product Class Involvement   | 5.49b           | 5.97a | 5.58b     | 6.11a |
| Price Quality Consciousness | 5.78a           | 5.74a | 5.92a     | 5.83a |
| Neophobia                   | 5.78a           | 5.74a | 5.91a     | 5.84a |
| Sensation Seeking           | 5.72a           | 5.79a | 5.81a     | 5.92a |
| Compliance                  | 5.57b           | 5.88a | 5.65b     | 6.01a |
| General Self-Efficacy       | 5.68a           | 5.85a | 5.79a     | 5.97a |
| Resilience                  | 5.64a           | 5.88a | 5.69b     | 6.05a |

Note: Upper-case letters refer to test supplements. Different lower-case letters beside each low and high rating within each product represents a significant difference at  $\alpha=0.05$ .

**Table S2B.** Study 2: Average Overall Liking (Monday and Friday) by psychographic group (low and high).

| Study<br>Product<br>Scorers | 2. US (2015) |       |           |       |           |       |
|-----------------------------|--------------|-------|-----------|-------|-----------|-------|
|                             | C (n=204)    |       | D (n=179) |       | E (n=174) |       |
|                             | Low          | High  | Low       | High  | Low       | High  |
| AIOS                        | 5.87a        | 6.28a | 6.28a     | 6.75a | 6.16a     | 6.50a |
| Seek active                 | 5.97a        | 6.29a | 6.28b     | 6.85a | 6.34a     | 6.41a |
| Product Class Involvement   | 5.76b        | 6.50a | 6.15b     | 7.10a | 5.80b     | 6.97a |
| Price Quality Consciousness | 5.99a        | 6.31a | 6.48a     | 6.65a | 6.37a     | 6.38a |
| Neophobia                   | 6.41a        | 5.81b | 6.49a     | 6.67a | 6.48a     | 6.25a |
| Sensation Seeking           | 6.02a        | 6.27a | 6.75a     | 6.40a | 6.27a     | 6.49a |
| Compliance                  | 5.76b        | 6.55a | 6.03b     | 6.96a | 6.01b     | 6.59a |
| General Self-Efficacy       | 5.76b        | 6.53a | 6.33a     | 6.77a | 6.40a     | 6.36a |
| Resilience                  | 5.66b        | 6.59a | 6.19b     | 6.91a | 6.29b     | 6.44a |

Note: Upper-case letters refer to test supplements. Different lower-case letters beside each low and high rating within each product represents a significant difference at  $\alpha=0.05$ .

**Table S2C.** Study 3: Average Overall Liking (Monday and Friday) by psychographic group (low and high).

| Study<br>Product<br>Scorers | 3. Germany (2017) |       |           |       |
|-----------------------------|-------------------|-------|-----------|-------|
|                             | F (n=182)         |       | G (n=182) |       |
|                             | Low               | High  | Low       | High  |
| AIOS                        | 6.75a             | 7.08a | 6.14b     | 6.74a |
| Seek active                 | 6.45b             | 7.13a | 5.81b     | 6.73a |
| Product Class Involvement   | 6.39b             | 7.32a | 5.73b     | 6.97a |
| Price Quality Consciousness | 6.90a             | 6.88a | 6.32a     | 6.40a |
| Neophobia                   | 7.10a             | 6.64b | 6.62a     | 6.14b |
| Sensation Seeking           | 6.92a             | 6.85a | 6.47a     | 6.30a |
| Compliance                  | 6.46b             | 7.26a | 5.88b     | 6.84a |
| General Self-Efficacy       | 6.78a             | 7.01a | 6.25a     | 6.56a |
| Resilience                  | 6.61b             | 7.17a | 6.07b     | 6.72a |

Note: Upper-case letters refer to test supplements. Different lower-case letters beside each low and high rating within each product represents a significant difference at  $\alpha=0.05$ .

**Table S2D.** Study 4: Average Overall Liking (Monday and Friday) by psychographic group (low and high).

| Study<br>Product<br>Scorers | 4. Japan (2019) |       |           |       |
|-----------------------------|-----------------|-------|-----------|-------|
|                             | H (n=206)       |       | I (n=206) |       |
|                             | Low             | High  | Low       | High  |
| AIOS                        | 5.97a           | 5.84a | 5.86a     | 6.08a |
| Seek active                 | 5.66b           | 6.12a | 5.66b     | 6.17a |
| Product Class Involvement   | 5.73b           | 6.04a | 5.63b     | 6.16a |
| Price Quality Consciousness | 5.67b           | 6.08a | 5.93a     | 5.96a |
| Neophobia                   | 5.92a           | 5.92a | 6.07a     | 5.83a |
| Sensation Seeking           | 5.87a           | 5.96a | 5.84a     | 6.04a |
| Compliance                  | 5.86a           | 5.94a | 5.81a     | 6.02a |
| General Self-Efficacy       | 5.82a           | 6.00a | 5.79a     | 6.09a |
| Resilience                  | 5.77a           | 6.08a | 5.81a     | 6.11a |

Note: Upper-case letters refer to test supplements. Different lower-case letters beside each low and high rating within each product represents a significant difference at  $\alpha=0.05$ .

**Table S2E.** Study 5: Average Overall Liking (Monday and Friday) by psychographic group (low and high).

| Study<br>Product<br>Scorers | 5. US (2019) |       |           |       |
|-----------------------------|--------------|-------|-----------|-------|
|                             | J (n=217)    |       | K (n=217) |       |
|                             | Low          | High  | Low       | High  |
| AIOS                        | 6.87a        | 6.94a | 6.74a     | 6.96a |
| Seek active                 | 6.54b        | 7.24a | 6.54b     | 7.17a |
| Product Class Involvement   | 6.40b        | 7.35a | 6.39b     | 7.30a |
| Price Quality Consciousness | 6.60b        | 7.21a | 6.62b     | 7.12a |
| Neophobia                   | 7.10a        | 6.66b | 6.99a     | 6.73a |
| Sensation Seeking           | 7.07a        | 6.76a | 7.01a     | 6.75a |
| Compliance                  | 6.48b        | 7.24a | 6.40b     | 7.23a |
| General Self-Efficacy       | 6.70b        | 7.13a | 6.57b     | 7.18a |
| Resilience                  | 6.69b        | 7.11a | 6.65b     | 7.08a |

Note: Upper-case letters refer to test supplements. Different lower-case letters beside each low and high rating within each product represents a significant difference at  $\alpha=0.05$ .

**Table S2F.** Study 6: Average Overall Liking (Monday and Friday) by psychographic group (low and high).

| Study<br>Product<br>Scorers | 6. Thailand (2019) |       |           |       |           |       |
|-----------------------------|--------------------|-------|-----------|-------|-----------|-------|
|                             | L (n=217)          |       | M (n=234) |       | N (n=222) |       |
|                             | Low                | High  | Low       | High  | Low       | High  |
| AIOS                        | 6.75b              | 7.12a | 7.28a     | 7.26a | 7.36a     | 7.23a |
| Seek active                 | 6.80a              | 7.05a | 6.98b     | 7.50a | 7.19a     | 7.38a |
| Product Class Involvement   | 6.86a              | 7.00a | 6.98b     | 7.55a | 7.10b     | 7.48a |
| Price Quality Consciousness | 6.75a              | 7.07a | 7.20a     | 7.30a | 7.23a     | 7.33a |
| Neophobia                   | 6.90a              | 6.97a | 7.29a     | 7.25a | 7.29a     | 7.29a |
| Sensation Seeking           | 6.96a              | 6.91a | 7.31a     | 7.24a | 7.40a     | 7.20a |
| Compliance                  | 6.72b              | 7.10a | 7.09b     | 7.44a | 7.17a     | 7.41a |
| General Self-Efficacy       | 6.73b              | 7.13a | 7.01b     | 7.47a | 7.20a     | 7.36a |
| Resilience                  | 6.83a              | 7.03a | 7.03b     | 7.48a | 7.18a     | 7.37a |

Note: Upper-case letters refer to test supplements. Different lower-case letters beside each low and high rating within each product represents a significant difference at  $\alpha=0.05$ .
